# Supplementary material for: The Escherichia coli Cell Division Protein and Model Tat Substrate SufI (FtsP) Localizes to the Septal Ring and Has a Multicopper Oxidase-Like Structure
Source: PubMed Central journal article supplement (PMC2661564; doi:10.1016/j.jmb.2008.12.043), 2009-02-20
Supplement: mmc1.pdf [file mmc1.pdf]

Supplementary Table 1. Localization of SufI-GFP in *fts* mutants

| Genetic Background <sup>a</sup> | Growth Conditions |      |       | No. of cells scored | Cell Length, Ave $\pm$ SD ( $\mu$ m) | No. of SufI-GFP rings | % of cells with rings | Ring spacing <sup>b</sup> |
|---------------------------------|-------------------|------|-------|---------------------|--------------------------------------|-----------------------|-----------------------|---------------------------|
|                                 | Temp              | NaCl | Sugar |                     |                                      |                       |                       |                           |
| WT                              | 30                | +    | -     | 195                 | 4.2 $\pm$ 1.0                        | 92                    | 47                    | 9.0                       |
|                                 | 37                | -    | -     | 311                 | 5.0 $\pm$ 1.2                        | 140                   | 45                    | 11                        |
| FtsZ(TS)                        | 30                | +    | -     | 272                 | 6.2 $\pm$ 1.7                        | 109                   | 36                    | 16                        |
|                                 | 37                | -    | -     | 186                 | 24.2 $\pm$ 8.3                       | 1                     | 1                     | 4500                      |
| FtsQ(dep)                       | 30                | +    | Ara   | 235                 | 6.7 $\pm$ 3.0                        | 116                   | 49                    | 14                        |
|                                 | 30                | +    | Glu   | 146                 | 34.3 $\pm$ 11.5                      | 4                     | 3                     | 1300                      |
| FtsL(dep)                       | 30                | +    | Ara   | 243                 | 6.8 $\pm$ 2.0                        | 106                   | 44                    | 16                        |
|                                 | 30                | +    | Glu   | 216                 | 22.1 $\pm$ 6.6                       | 4                     | 2                     | 1200                      |
| FtsN(dep)                       | 37                | -    | Ara   | 139                 | 5.5 $\pm$ 1.4                        | 63                    | 45                    | 12                        |
|                                 | 37                | -    | Glu   | 152                 | 25.1 $\pm$ 10.8                      | 24                    | 16                    | 160                       |

<sup>a</sup> The strains used were EC1873, EC2065, JOE170/pDSW932, JMG265/pDSW932, and EC1908/pDSW932.

<sup>b</sup> Sum of cell lengths divided by the total number of rings, rounded to two significant figures.
